# Supplementary material for: Robot-Assisted Arm Assessments in Spinal Cord Injured Patients: A Consideration of Concept Study
Source: PubMed Central journal article supplement (PMC4440615; doi:10.1371/journal.pone.0126948), 2015-05-21
Supplement: pone.0126948.s002.pdf [file pone.0126948.s002.pdf]

**Table S2. ARMin postures for the different joints measured during the STRENGTH assessment.**

|                                              | STRENGTH joint measured        |                            |                                   |                                      |                         |                              |                         |
|----------------------------------------------|--------------------------------|----------------------------|-----------------------------------|--------------------------------------|-------------------------|------------------------------|-------------------------|
|                                              | Lateral Shoulder ad-/abduction | Shoulder flexion/extension | Horizontal shoulder ad-/abduction | Shoulder internal-/external rotation | Elbow flexion/extension | Forearm pronation/supination | Wrist flexion/extension |
| Axis 1: Lateral shoulder ad-/abduction       | 60 ABD                         | 80 ABD                     | 90 ABD                            | 90 ABD                               | 90 ABD                  | 50 ABD                       | 50 ABD                  |
| Axis 2: Horizontal shoulder ad-/abduction    | 90 ABD                         | 20 ABD                     | 45 ABD                            | 20 ABD                               | 20 ABD                  | 90 ABD                       | 90 ABD                  |
| Axis 3: Shoulder internal-/external rotation | 85 EXR                         | 85 EXR                     | 85 EXR                            | 45 EXR                               | 0                       | 0                            | 0                       |
| Axis 4: Elbow flexion/extension              | 0                              | 0                          | 0                                 | 90 FLEX                              | 90 FLEX                 | 90 FLEX                      | 90 FLEX                 |
| Axis 5: Forearm pronation/supination         | 0                              | 0                          | 0                                 | 0                                    | 85 SUP                  | 50 SUP                       | 50 SUP                  |
| Axis 6: Wrist flexion/extension              | 0                              | 0                          | 0                                 | 0                                    | 0                       | 0                            | 0                       |

ABD=Abduction, EXR=External rotation, FLEX=Flexion, SUP=Supination.
