# Supplementary material for: Robot-Assisted Arm Assessments in Spinal Cord Injured Patients: A Consideration of Concept Study
Source: PubMed Central journal article supplement (PMC4440615; doi:10.1371/journal.pone.0126948), 2015-05-21
Supplement: pone.0126948.s003.pdf [file pone.0126948.s003.pdf]

**Table S3. Summary of the inter-rater analysis of WORKSPACE and QOM.**

|                                    | <b>Assessment parameter</b>           | <b>Spearman's correlation coefficient</b> | <b>Bland-Altman t-test significance</b> |
|------------------------------------|---------------------------------------|-------------------------------------------|-----------------------------------------|
| <b>WORKSPACE</b>                   | Mean of <i>cubic volume</i>           | 0.77* (p=0.014)                           | 0.025                                   |
|                                    | <i>Workspace levels</i>               | 0.75* to 1.0**<br>(p<0.02 for all dir.)   | p>0.035<br>(sign. for "down" dir.)      |
| <b>QOM</b>                         | Mean <i>D-P ratio to target</i>       | 0.29 (p=0.535)                            | 0.496                                   |
|                                    | Mean <i>D-P ratio to start</i>        | 0.48 (p=0.233)                            | 0.298                                   |
|                                    | Mean <i>Precision</i>                 | 0.68 (p=0.094)                            | 0.112                                   |
|                                    | Mean <i>Number of peaks to target</i> | 0.46 (p=0.294)                            | 0.854                                   |
|                                    | Mean <i>Number of peaks to start</i>  | 0.71* (p=0.047)                           | 0.923                                   |
|                                    | Mean <i>Time to target</i>            | 0.36 (p=0.432)                            | 0.550                                   |
|                                    | Mean <i>Time to start</i>             | 0.21 (p=0.610)                            | 0.069                                   |
|                                    | Mean <i>Reaction time to target</i>   | 0.10 (p=0.823)                            | 0.887                                   |
| Mean <i>Reaction time to start</i> | 0.29(p=0.493)                         | 0.821                                     |                                         |

\*= p<0.05, \*\*= p<0.01.
