# Supplementary material for: Robot-Assisted Arm Assessments in Spinal Cord Injured Patients: A Consideration of Concept Study
Source: PubMed Central journal article supplement (PMC4440615; doi:10.1371/journal.pone.0126948), 2015-05-21
Supplement: pone.0126948.s004.pdf [file pone.0126948.s004.pdf]

**Table S4. Variability in the assessment parameters measured.**

|                                 | Mean(Range, i.e. difference between max and min value) |                          |                           |                            |                          |                          |                          |                          | Mean(Standard deviation) |             |
|---------------------------------|--------------------------------------------------------|--------------------------|---------------------------|----------------------------|--------------------------|--------------------------|--------------------------|--------------------------|--------------------------|-------------|
|                                 | m1                                                     | m2                       | m3                        | m4                         | m5                       | m6                       | m7                       | m8                       |                          |             |
| aROM<br>[°]                     | 47.9(4.2)<br>130.8(1.1)                                | 46.7(3.9)<br>130.7(1.3)  | -34.9(6.3)<br>123.6(2.0)  | -28.6(3.5)<br>87.9(2.3)    | -0.5(0.7)<br>118.9(2.1)  | -88.8(2.9)<br>44.6(18.3) | -34.1(4.2)<br>37.4(4.0)  | -                        | QOM Time<br>[ms]         | 1566(395)   |
| pROM<br>[°]                     | 50.3(7.5)<br>130.2(0.9)                                | 47.7(3.9)<br>130.6(0.7)  | -29.1(12.1)<br>121.3(2.5) | -27.5(3.7)<br>89.7(1.3)    | -0.6(0.4)<br>116.7(4.1)  | -89.7(1.1)<br>85.5(6.9)  | -33.8(3.9)<br>36.6(3.5)  | -                        | QOM Peak<br>[°]          | 18.6(9.4)   |
| STRENGTH<br>[Nm]                | 37.7(11.2)<br>30.6(12.2)                               | 37.5(15.8)<br>45.5(15.4) | 28.6(11.1)<br>32.5(8.0)   | 15.9(4.8)<br>14.8(3.9)     | 21.8(5.2)<br>24.3(7.3)   | 4.9(2.4)<br>3.1(1.7)     | 4.2(1.1)<br>4.6(2.1)     | 1.4(0.6)<br>1.5(0.6)     | QOM D-P ratio<br>[°]     | 1.19(0.18)  |
| RPM 30°/s<br>[Nm/rad]           | -1.57(3.88)<br>0.51(5.46)                              | -                        | 1.03(1.23)<br>0.58(1.02)  | -1.05(0.94)<br>-0.47(0.51) | 0.61(0.64)<br>0.38(0.59) | 0.00(0.26)<br>0.34(1.20) | 0.4(0.21)<br>0.25(0.19)  | 1.89(1.57)<br>1.43(1.59) | QOM Reaction<br>[ms]     | 877(226)    |
| RPM 60°/s<br>[Nm/rad]           | -1.53(3.32)<br>0.73(4.15)                              | -                        | 0.39(1.96)<br>-0.16(1.90) | -1.42(1.10)<br>-0.38(0.48) | 0.64(0.51)<br>0.39(0.50) | 0.09(0.24)<br>0.31(0.14) | 0.47(0.26)<br>0.27(0.25) | 1.67(1.38)<br>2.27(1.95) | QOM Precision<br>[m]     | 0.036(0.01) |
| WORKSPACE<br>[dm <sup>3</sup> ] | 139.4(1.3)                                             |                          |                           |                            |                          |                          |                          |                          |                          |             |

For aROM, pROM, WORKSPACE, STRENGTH and RPM the mean differences are shown between the maximum and minimum values measured during the four recordings of the intra-rater reliability. For the QOM assessment the standard deviation is used as an indicator for the variability of the recorded parameters. m1 = shoulder add-/abduction, m2 = shoulder extension/flexion, m3 = horizontal shoulder add-/abduction, m4 = shoulder internal/external rotation, m5 = elbow extension/flexion, m6 = elbow pro-/supination, m7 = wrist extension/flexion, m8 = hand closing/opening.
